# Supplementary material
Source: PubMed Central journal article supplement (PMC1317921)
Supplement: pnas_0505966102_1.pdf [file pnas_0505966102_1.pdf]

Table 2. Ages of individual trees in three sites estimated from radiocarbon ages.

| Site       | DBH, cm                                   | Scientific name                                                    | Group     | Age, years  | $\Delta^{14}\text{C}\%$ | Libby age, years | Number of radiocarbon sample by stem |
|------------|-------------------------------------------|--------------------------------------------------------------------|-----------|-------------|-------------------------|------------------|--------------------------------------|
| Manaus     | 13.3                                      | <i>Rinorea racemosa</i> (Mart.) Kuntze                             | Subcanopy | 195 ± 155   | -26.6 ± 4.4             | 190 ± 40         | 1                                    |
|            | 14.0                                      | <i>Tachigali myrmecophila</i> Ducke.                               | Subcanopy | 185 ± 145   | -22.9 ± 4.3             | 160 ± 40         | 1                                    |
|            | 18.0                                      | <i>Rollinia insignis</i> R. E. Fr.                                 | Subcanopy | 37 ± 1      | 301.8 ± 5.9             | Modern           | 1                                    |
|            | 22.5                                      | <i>Brosimum rubescens</i> Taub.                                    | Canopy    | 192 ± 150   | -25.4 ± 3.9             | 155 ± 35         | 1                                    |
|            | 23.3                                      | <i>Crepidospermo gontiano</i>                                      | Subcanopy | 195 ± 155   | -27.6 ± 4.4             | 190 ± 40         | 1                                    |
|            | 24.5                                      | <i>Micrandropsis scleroxylon</i> (W. Rod),                         | Canopy    | 180 ± 30    | -14.4 ± 4.4             | 70 ± 40          | 1                                    |
|            | 25.5                                      | <i>Bocageopsis multiflora</i> (Mart.) R.E.Fr.                      | Canopy    | 50 ± 5      | -6.5 ± 4.2              | Modern           | 1                                    |
|            | 26.5                                      | <i>Escheweilera odora</i> (Poepp.) Miers                           | Subcanopy | 175 ± 135   | -8.8 ± 4.5              | 40 ± 40          | 1                                    |
|            | 28.6                                      | <i>Scleronema micranthum</i> Ducke                                 | Canopy    | 280 ± 212   | -36.2 ± 4.4             | 250 ± 40         | 1                                    |
|            | 29.3                                      | <i>Pouteria</i> spp.                                               | Canopy    | 461 ± 101   | -53.1 ± 4.3             | 420 ± 40         | 1                                    |
|            | 30.0                                      | <i>Aspidosperma album</i> (Vahl) R. Ben.                           | Subcanopy | 277 ± 85    | -31.5 ± 4.1             | 205 ± 35         | 1                                    |
|            | 38.5                                      | <i>Pouteria</i> spp.                                               | Canopy    | 537 ± 55    | -58.0 ± 4.0             | 430 ± 35         | 1                                    |
|            | 43.0                                      | <i>Brosimum paraense</i> Huber                                     | Canopy    | 122 ± 80    | -20.4 ± 3.7             | 115 ± 35         | 1                                    |
|            | 44.0                                      | <i>Couepia longipendula</i> Pilger                                 | Canopy    | 347 ± 145   | -55.3 ± 4.0             | 405 ± 35         | 1                                    |
|            | 45.0                                      | <i>Corytophora alta</i> Knuth                                      | Canopy    | 422 ± 80    | -45.6 ± 3.5             | 325 ± 30         | 1                                    |
|            | 49.0                                      | <i>Nectandra rubra</i> (Mez.) CK Allen                             | Canopy    | 418         | -45.2 ± 4.3             | 370 ± 40         | 7                                    |
|            | 51.8                                      | <i>Endopleura uchi</i> (Huber) Cuatr.                              | Canopy    | 282 ± 80    | -35.9 ± 4.1             | 245 ± 35         | 1                                    |
|            | 55.0                                      | <i>Licaria guianensis</i> Aublet                                   | Canopy    | 272 ± 80    | -34.5 ± 3.5             | 230 ± 30         | 1                                    |
|            | 55.0                                      | <i>Pseudopiptadenia psilostachya</i> (Benth.) G.P.Lewis & M.P.Lima | Emergent  | 280 ± 80    | -18.0 ± 4.5             | 100 ± 40         | 1                                    |
|            | 58.0                                      | <i>Corytophora alta</i> Knuth                                      | Canopy    | 445 ± 95    | -48.1 ± 3.8             | 345 ± 38         | 1                                    |
|            | 60.0                                      | <i>Virola</i> spp.                                                 | Canopy    | 175 ± 145   | -29.1 ± 3.9             | 185 ± 35         | 1                                    |
| 70.0       | <i>Peltogyne paniculata</i> Benth.        | Canopy                                                             | 185 ± 145 | -19.7 ± 4.7 | 110 ± 40                | 1                |                                      |
| 71.0       | <i>Parkia</i> spp.                        | Emergent                                                           | 137 ± 65  | -15.2 ± 4.0 | 75 ± 35                 | 1                |                                      |
| Rio Branco | 10.3                                      | <i>Sclerolobium</i> sp.                                            | Canopy    | 46          | 110.2 ± 6.9             | Modern           | 4                                    |
|            | 11.3                                      | <i>Manilkara paraensis</i> (Huber) Standl.                         | Canopy    | 138         | -33.3 ± 4.3             | 220 ± 40         | 4                                    |
|            | 13.0                                      | <i>Mezilaurus itauba</i> (Meissn.) Taub. ex Mez                    | Canopy    | 735         | -111.0 ± 4.9            | 900 ± 50         | 10                                   |
|            | 15.0                                      | <i>Tetragastris altissima</i> (Aubl) Swart                         | Emergent  | 120         | -18.5 ± 4.4             | 100 ± 40         | 4                                    |
|            | 17.0                                      | <i>Carapa guianensis</i> Aubl.                                     | Canopy    | 785         | -102.1 ± 4.4            | 820 ± 40         | 7                                    |
|            | 18.9                                      | <i>Sclerolobium</i> sp.                                            | Canopy    | 22          | 288.9 ± 9.6             | Modern           | 4                                    |
|            | 23.3                                      | <i>Pouteria</i> sp.                                                | Canopy    | 300         | -17.1 ± 5.9             | 90 ± 50          | 4                                    |
|            | 23.3                                      | <i>Sclerolobium</i> sp.                                            | Canopy    | 19          | 243.7 ± 4.5             | Modern           | 6                                    |
|            | 28.0                                      | <i>Sclerolobium</i> sp.                                            | Canopy    | 55          | 90.8 ± 4.4              | Modern           | 6                                    |
|            | 33.0                                      | <i>Amburana cearensis</i> Fr. Aliem.                               | Emergent  | 190 ± 145   | -26.0 ± 4.4             | 160 ± 40         | 1                                    |
|            | 35.2                                      | <i>Hirtella</i> sp.*                                               | Canopy    | 264         | -20.3 ± 3.6             | 120 ± 30         | 8                                    |
|            | 35.3                                      | <i>Guatteria</i> sp.                                               | Canopy    | 41          | 136.53 ± 7.32           | Modern           | 7                                    |
|            | 35.5                                      | <i>Pseudolmedia murure</i> Standl.                                 | Canopy    | 51          | 13.6 ± 5.2              | Modern           | 5                                    |
|            | 37.5                                      | <i>Carapa guianensis</i> Aubl.                                     | Canopy    | 172         | -228.2 ± 3.2            | 1370 ± 50        | 6                                    |
|            | 42.9                                      | <i>Pourouma</i> spp.                                               | Pioneer   | 186         | -25.1 ± 5.1             | 155 ± 45         | 4                                    |
|            | 43.8                                      | <i>Inga alba</i> (Sw.) Willd.                                      | Emergent  | 40          | 399.0 ± 4.6             | Modern           | 5                                    |
|            | 45.2                                      | <i>Bertholletia excelsa</i> H. B. K.                               | Emergent  | 840         | -105.5 ± 4.2            | 845 ± 40         | 6                                    |
|            | 48.0                                      | <i>Pourouma</i> spp.*                                              | Subcanopy | 58          | 136.0 ± 5.0             | Modern           | 7                                    |
|            | 48.4                                      | <i>Tetragastris altissima</i> (Aubl) Swart                         | Emergent  | 188         | -26.2 ± 4.7             | 165 ± 40         | 4                                    |
|            | 48.7                                      | <i>Pouteria</i> sp.                                                | Canopy    | 110         | -16.5 ± 4.9             | 80 ± 40          | 7                                    |
|            | 52.0                                      | <i>Hymenaea oblongifolia</i> Hub.*                                 | Canopy    | 93          | -14.9 ± 4.9             | 70 ± 40          | 8                                    |
|            | 54.2                                      | <i>Qualea grandiflora</i> Mart. *                                  | Emergent  | 1,270       | -46.4 ± 4.4             | 330 ± 40         | 6                                    |
|            | 64.0                                      | <i>Hymenaea courbaril</i> L.                                       | Canopy    | 190         | -29.2 ± 3.5             | 190 ± 30         | 5                                    |
|            | 71.1                                      | <i>Myroxylon balsamum</i> Harms                                    | Canopy    | 603         | -28.6 ± 4.4             | 180 ± 40         | 7                                    |
|            | 76.0                                      | <i>Manilkara huberi</i> (Ducke) Chevalier                          | Emergent  | 549         | -40.5 ± 4.3             | 340 ± 40         | 5                                    |
|            | 79.0                                      | <i>Aspidosperma macrocarpon</i> Mart.                              | Emergent  | 525         | -55.8 ± 4.0             | 410 ± 35         | 6                                    |
|            | 89.9                                      | <i>Dipteryx odorata</i> (Aldl.) Willd                              | Emergent  | 540         | -46.4 ± 3.7             | 330 ± 40         | 6                                    |
|            | 91.0                                      | <i>Enterolobium maximum</i> Ducke                                  | Emergent  | 190         | -27.7 ± 4.5             | 180 ± 40         | 4                                    |
|            | 96.1                                      | <i>Hymenolobium</i> spp.                                           | Emergent  | 439         | -50.4 ± 3.5             | 365 ± 30         | 5                                    |
|            | 101.0                                     | <i>Bertholletia excelsa</i> H. B. K.                               | Emergent  | 996         | -130.9 ± 4.2            | 1080 ± 40        | 4                                    |
|            | 102.5                                     | <i>Ceiba pentandra</i> (L.) Gaertn.                                | Emergent  | 300         | -23.1 ± 4.4             | 140 ± 40         | 5                                    |
|            | 119.0                                     | <i>Enterolobium maximum</i> Ducke                                  | Emergent  | 590         | -77.5 ± 3.9             | 600 ± 40         | 4                                    |
| 129.5      | <i>Bertholletia excelsa</i> H. B. K.*     | Emergent                                                           | 668       | -42.1 ± 3.8 | 295 ± 35                | 6                |                                      |
| Santarém   | 16.9                                      | <i>Coussarea racemosa</i> A. Rich. *                               | Subcanopy | 162         | -21.7 ± 3.5             | 125 ± 30         | 4                                    |
|            | 20.4                                      | <i>Protium apiculatum</i> Swart                                    | Canopy    | 280         | -36.6 ± 5.2             | 250 ± 45         | 4                                    |
|            | 25.6                                      | <i>Inga alba</i> (Sw.) Willd.                                      | Canopy    | 40          | 125.7 ± 5.3             | Modern           | 4                                    |
|            | 27.1                                      | <i>Guatteria poeppigiana</i> Mart.                                 | Canopy    | 20          | 252.7 ± 5.1             | Modern           | 7                                    |
|            | 30.6                                      | <i>Couratari guianensis</i> Aubl.*                                 | Canopy    | 190         | -11.4 ± 3.6             | 40 ± 30          | 4                                    |
|            | 35.5                                      | <i>Tachigalia alba</i> Ducke*                                      | Canopy    | 45          | 102.8 ± 4.0             | Modern           | 4                                    |
|            | 38.2                                      | <i>Ocotea</i> sp.                                                  | Subcanopy | 187         | -26.3 ± 4.4             | 170 ± 40         | 4                                    |
|            | 40.4                                      | <i>Manilkara huberi</i> (Ducke) Chevalier                          | Canopy    | 191         | -27.4 ± 4.8             | 160 ± 40         | 8                                    |
|            | 42.0                                      | <i>Protium apiculatum</i> Swart                                    | Canopy    | 47          | 105.8 ± 5.3             | Modern           | 4                                    |
|            | 43.7                                      | <i>Pouteria guianensis</i> Aubl.*                                  | Canopy    | 390         | -20.1 ± 3.4             | 110 ± 30         | 4                                    |
|            | 50.0                                      | <i>Sclerolobium</i> spp.*                                          | Canopy    | 57          | 390.4 ± 3.4             | Modern           | 4                                    |
|            | 55.0                                      | <i>Carapa guianensis</i> Aubl.                                     | Canopy    | 180 ± 120   | -20.7 ± 4.2             | 115 ± 30         | 1                                    |
|            | 56.0                                      | <i>Carapa guianensis</i> Aubl.                                     | Canopy    | 187 ± 145   | -27.2 ± 5.6             | 170 ± 50         | 1                                    |
|            | 61.0                                      | <i>Diplotropis purpurea</i> (Rich.) Amsh.                          | Canopy    | 207 ± 155   | -31.6 ± 5.2             | 205 ± 45         | 1                                    |
|            | 63.7                                      | <i>Pouteria torta</i> (Mart.) Radlk.*                              | Canopy    | 48          | 562.1 ± 3.5             | Modern           | 4                                    |
|            | 67.0                                      | <i>Clarisia racemosa</i> Ruiz & Pavon                              | Canopy    | 287 ± 85    | -38.9 ± 3.9             | 270 ± 35         | 1                                    |
|            | 68.0                                      | <i>Manilkara huberi</i> (Ducke) Chevalier                          | Canopy    | 422 ± 100   | -44.9 ± 4.6             | 320 ± 40         | 1                                    |
|            | 68.0                                      | <i>Astronium lecontei</i> Ducke                                    | Canopy    | 187 ± 135   | -24.5 ± 5.0             | 150 ± 45         | 1                                    |
|            | 72.0                                      | <i>Tabebuia</i> spp                                                | Emergent  | 622 ± 80    | -75.7 ± 5.5             | 580 ± 50         | 1                                    |
|            | 74.0                                      | <i>Swartzia</i> sp.                                                | Canopy    | 182 ± 120   | -23.1 ± 4.4             | 135 ± 40         | 1                                    |
|            | 75.0                                      | <i>Astronium lecontei</i> Ducke                                    | Canopy    | 187 ± 145   | -27.2 ± 4.9             | 170 ± 45         | 1                                    |
|            | 75.0                                      | <i>Cordia goeldiana</i> Huber                                      | Canopy    | 182 ± 130   | -23.8 ± 5.1             | 145 ± 45         | 1                                    |
|            | 77.0                                      | <i>Couratari guianensis</i> Aubl.                                  | Canopy    | 187 ± 135   | -24.6 ± 4.5             | 150 ± 40         | 1                                    |
|            | 83.0                                      | <i>Cedrela odorata</i> L.                                          | Canopy    | 187 ± 125   | -12.6 ± 4.7             | 50 ± 40          | 1                                    |
|            | 84.0                                      | <i>Carapa guianensis</i> Aubl.                                     | Canopy    | 277 ± 75    | -34.8 ± 4.5             | 235 ± 40         | 1                                    |
|            | 86.0                                      | <i>Pouteria bilocularis</i> (H. Winkl.)                            | Canopy    | 422 ± 80    | -45.3 ± 7.6             | 320 ± 70         | 1                                    |
|            | 87.0                                      | <i>Apuleia leiocarpa</i>                                           | Emergent  | 182 ± 120   | -35.3 ± 3.2             | 240 ± 30         | 1                                    |
|            | 90.0                                      | <i>Vatairea paraensis</i> Ducke                                    | Canopy    | 43 ± 1      | 14.2 ± 5.8              | Modern           | 1                                    |
|            | 95.0                                      | <i>Dipteryx odorata</i> (Aldl.) Willd                              | Emergent  | 460 ± 120   | -60.6 ± 7.3             | 450 ± 70         | 1                                    |
|            | 108.0                                     | <i>Bagassa guianensis</i> Aubl.                                    | Canopy    | 177 ± 135   | -19.3 ± 4.0             | 105 ± 35         | 1                                    |
|            | 109.0                                     | <i>Tabebuia</i> spp                                                | Emergent  | 637 ± 65    | -80.4 ± 3.9             | 625 ± 35         | 1                                    |
|            | 109.0                                     | <i>Vochysia maxima</i> Ducke                                       | Canopy    | 202 ± 160   | -31.0 ± 6.8             | 200 ± 60         | 1                                    |
|            | 113.0                                     | <i>Caryocar villosum</i> (Aubl.) Pers.                             | Emergent  | 627 ± 75    | -77.6 ± 5.7             | 600 ± 50         | 1                                    |
| 118.0      | <i>Hymenaea courbaril</i> L.              | Canopy                                                             | 280 ± 90  | -35.2 ± 3.2 | 235 ± 30                | 1                |                                      |
| 119.0      | <i>Astronium lecontei</i> Ducke           | Canopy                                                             | 202 ± 160 | -24.1 ± 5.7 | 145 ± 50                | 1                |                                      |
| 120.0      | <i>Couratari guianensis</i> Aubl.         | Canopy                                                             | 190 ± 150 | -29.5 ± 3.4 | 190 ± 30                | 1                |                                      |
| 123.0      | <i>Manilkara huberi</i> (Ducke) Chevalier | Canopy                                                             | 272 ± 230 | -38.1 ± 5.3 | 260 ± 45                | 1                |                                      |
| 130.0      | <i>Bagassa guianensis</i> Aubl.           | Canopy                                                             | 437 ± 85  | -48.1 ± 4.5 | 345 ± 40                | 1                |                                      |
| 131.0      | <i>Hymenaea courbaril</i> L.              | Canopy                                                             | 272 ± 80  | -37.6 ± 3.1 | 255 ± 30                | 1                |                                      |
| 131.0      | <i>Apuleia leiocarpa</i>                  | Emergent                                                           | 182 ± 120 | -20.8 ± 4.5 | 120 ± 40                | 1                |                                      |
| 143.0      | <i>Nectandra rubra</i> (Mez.) CK Allen    | Canopy                                                             | 465 ± 95  | -61.2 ± 4.2 | 455 ± 40                | 1                |                                      |

\* Sample without center (rollow), DBH = Diameter at breast height

Ages without error was determined by extrapolating growth rates determined by multiple radiocarbon measurements over the last 50 years over the lifetime of the tree. The error in the other cases represents the span between the minimum and maximum age obtained by OxCal calibration program. Here is reporting the  $\Delta^{14}\text{C}\%$  and Libby age only for the oldest part of the tree.
